# Supplementary material for: Rat Olfactory Mucosa Mesenchymal Stem/Stromal Cells (OM-MSCs): A Characterization Study
Source: Hindawi journal article supplement (doi:10.1155/2020/2938258), 2020-01-29
Supplement: f1 [file 2938258.f1.pdf]

822 **Supplementary Material:**

823 The Table S1 represents the list of genes under study with the respective amplicon context sequences,  
 824 ensemble gene ID and PCR product lengths.

825 **S1 Table** - List of genes under study with respective amplicon context sequence, ensemble gene ID and PCR  
 826 product length.

827

828

829

830

831

832

833

834

835

836

837

838

839

840

| Marker Type   | Marker       | Gene Symbol | Amplicon Context Sequence                                                                                                                                                                                                              | Ensembl Gene ID                                                                                                                                          | PCR product        |        |
|---------------|--------------|-------------|----------------------------------------------------------------------------------------------------------------------------------------------------------------------------------------------------------------------------------------|----------------------------------------------------------------------------------------------------------------------------------------------------------|--------------------|--------|
| Housekeeping  | GAPDH        | Gapdh       | TGATGGCAACAATGTCCACTTTGTCCACAAGAGAAGGCAGCCCTGGTA<br>ACCAGGCGTCCGATACGGCCAAATCCGTTACACCGACCTTACCAT<br>CTTGTCTATGAGACGAGGCTGGCACTGCACAAGAAGATGCGGCTGTC<br>TCTA                                                                           | ENSRNOG00000018630                                                                                                                                       | 115 bp             |        |
| Multipotency  | Nanog        | Nanog       | GAAAATTATTCTTGTACAAGTGTCTGCTACTGAGATGCTCTGCACA<br>GAGACTGCCTCTCCGCTTCTCTGCGGACCTACCTTCAAGAT<br>AGCCCTGATTCTTAGCAAT                                                                                                                     | ENSRNOG00000008368                                                                                                                                       | 87 bp              |        |
|               | Oct4         | Pou5f1      | GCAGTTGGCAAAGTGTCTAGCTCTTCTGCGAGGCTTTCATATCCT<br>GGGACT CCTCGGACTAGGTTCCACCTTCTCCAACCTCACGGC                                                                                                                                           | ENSRNOG00000046487                                                                                                                                       | 61 bp              |        |
|               | Sox2         | Sox2        | GCAGTACAACCTCCATGACAGCTCGCAGACTACATGAACGGCTCGC<br>CCACCTACAGCATGCTCTACTCGCAGCAGGGCACCCTGGTATGGCG<br>CTGGGCTCCATGGGCTCTGGTCAAGTCCGAGGCCAGTTC                                                                                            | ENSRNOG00000012199                                                                                                                                       | 106 bp             |        |
| MSCs          | CD105        | Eng         | AAGTCTACAAGACTGTCTCATGCGCTGAACATCGTCACTGCTGACC<br>TGTCTGGCAAAGGCTCGCTCGCCCTGTACTGGGCATCACCTTTG<br>GTGCTTCTCATTGGGGCCCTGCTCACAGCTGCACTGTGTACATCT<br>ATTCTCACACAGTGAGTATCCCAAGCTTCCACCCCTTCTACAG<br>TGAGTGTCTAGGGCCGCTCCACACCAACCCAGGGCA | ENSRNOG00000050190                                                                                                                                       | 198 bp             |        |
|               | CD109        | Thy1        | TTGACTGTGTCTGCTCGTGTATAGTGATACTGTTGAAAGTATCG<br>CCAGTAGGCAAGGAGGGGGAGGGCCCTCAAGATAGGAGAGCGCT<br>GCTGAGCCTTTGGGACCAACAATAAGGATGAGAAGTATAGATTGTA                                                                                         | ENSRNOG00000006604                                                                                                                                       | 110 bp             |        |
|               | CD73         | Nt5e        | ACTTCTATGGAATCCCATTTCTGAAACAGCACCATTCTGGAAGAT<br>GCAGCCATCAAGCAGACATTAACCAAGTGGAGGATAAAATTAGATA<br>ATTATTCTACAGGAACTCGGGAG                                                                                                             | ENSRNOG00000011071                                                                                                                                       | 89 bp              |        |
|               | CD44         | CD44        | ATGTAGCCTCTGGGGTGTCTTCTCAATGGTGGATCCACTGCTGACA<br>TCCTCATATAATGTTTGGGACATCGATGCTTCTTGGTGTGTTCTAT<br>ACTCGCCCTTCTGCTGTA                                                                                                                 | ENSRNOG00000006094                                                                                                                                       | 86 bp              |        |
| Hematopoietic | CD45         | Ptprc       | CTCTTTTGCTCATCTAGTTCATGCTTAAGTGGCACTGTAAAGT<br>CATATGGAACAACGTTAGAAGCTGTTTTTTCTTTTCTTCTTGA<br>TTTCCAATGTGCTGTCTCCAGCTCCTGTATGAAGGAAGTCTCTGG<br>TAC                                                                                     | ENSRNOG00000000655                                                                                                                                       | 120 bp             |        |
|               | CD34         | CD34        | AACCGTCACACTGCCTACTACTTCAGACAGTACTTCTACTCCAGAAGT<br>GGAACTCCACTGGAAACACAGCCTGCCGTGTCAATGTTTCTGA<br>TTATTACCTAAATAATGTCAAGCTCTGAGATGATATCAACCACTGAG                                                                                     | ENSRNOG00000050078                                                                                                                                       | 112 bp             |        |
| Hematopoietic | Osteogenic   | BSP         | lbsp                                                                                                                                                                                                                                   | TCCCGCGAGGCTCCCGTGTCTGCTATAGGTTTCATACGCAAGT<br>TTGACTCGTTGCTATTGTTGCTATTCTTCCCACTAACCGTGTCT<br>GCTCTTCTGGTGG                                             | ENSRNOG00000002158 | 83 bp  |
|               |              | Runx2       | Runx2                                                                                                                                                                                                                                  | CACACGTGTAGTAAAGGCTCAACCATGACACGTACAGCCTAGGAAC<br>ACAGATGCATTAGGAGTGTGACCCCGCCCTTACCACACAG<br>CCATTCAGGGG                                                | ENSRNOG00000020193 | 74 bp  |
|               | Chondrogenic | Coll II     | Col2a1                                                                                                                                                                                                                                 | CAAGGCCCTTCTGAGGTTGCCGGCTGCTCGTCCAGGTAGGCAATGCT<br>GTTCTTACAGTGGTAGGTGATGTTCTGGGAGCCCTCAGTGGACAGTA<br>GACGGAGG                                           | ENSRNOG00000022282 | 73 bp  |
|               |              | Aggrecan    | Acan                                                                                                                                                                                                                                   | CCCCTACCCTGCTTCTCCAGAAGGTCAGGAGAAACAGAGTCAACC<br>GCTGCAGACATTGATGAGTGCCTTCAAGCCCTTGTGAAATGGAGC<br>CACCTGCGTGGATGCCTTGGACACTTTCACATGCTTATGCCTTCC          | ENSRNOG00000028992 | 109 bp |
|               | Adipogenic   | Ap-2        | Ap2m1                                                                                                                                                                                                                                  | AGTGCACTGTCTGAGTCTGTTGGGTAGCCAAAGTCCAGAAATCTCG<br>TCCAGCAGCTGTATATGAGCACGAAATGTTCTTGATGTTCTCTCG<br>CTGATCTTGCCAAAGTAAGCAGCCATTACATCA                     | ENSRNOG00000001709 | 99 bp  |
|               |              | AdipoQ      | Adipoq                                                                                                                                                                                                                                 | TTCATGACTGGGAGGATTAAGAGGAAACAGGAGCGCTTGAACAGT<br>AGCATCTGAGTCTGGAACTTTGGTGAATCAGATCCACTGGCACT<br>CGTACAGACAGGAATGAAG                                     | ENSRNOG00000001821 | 83 bp  |
|               | Neurogenic   | NGF         | Ngf                                                                                                                                                                                                                                    | TTCATGACTGGGAGGATTAAGAGGAAACAGGAGCGCTTGAACAGT<br>AGCATCTGAGTCTGGAACTTTGGTGAATCAGATCCACTGGCACT<br>CGTACAGACAGGAATGAAG                                     | ENSRNOG00000001821 | 83 bp  |
|               |              | GDNF        | Gdnf                                                                                                                                                                                                                                   | GGCTTTGCCAAGGACGAGCTTCTATCTGGCCACTCTGAGGTGCAT<br>AGCGTAATGTCCATGTTGTTCTACTCTGATCAGCGTTTTGATCG<br>GCGTACAGGCAGAACCGTACACAGATAGCAATGTC                     | ENSRNOG00000016571 | 103 bp |
|               | Tenogenic    | Tenomodulin | Tnmd                                                                                                                                                                                                                                   | ACTGAAGATTTGTGGACTAGTGTGGTATCTGGCCCTAACTCTAAT<br>TGTCTGTTTTGGGGAGCAACAACCTTCTGGCCGAGGTATCCAAGA<br>AGACCTATGGCATGGAGCACATTTCTACAGCAATGGCGAGAAGAA<br>GAAGA | ENSRNOG00000003896 | 116 bp |
|               | Muscle       | Desmin      | Des                                                                                                                                                                                                                                    | ACCAGGATCTGCTCAATGTGAAGATGGCCTTGGATGTGGAGATTGCC<br>ACCTACCAGGAAAGTCTGGAGGGCAGGAGAGCAGGATCAACCTTC<br>CGATCCAGACCTTCTGCTCAACTTCCGAGAAAC                    | ENSRNOG00000019810 | 100 bp |
